# Supplementary material for: Effects of Live Music Therapy on Autonomic Stability in Preterm Infants: A Cluster-Randomized Controlled Trial
Source: MDPI journal article supplement (doi:10.3390/children8111077), 2021-11-22
Supplement: s1 [file s1]

## Supplementary material

*Table S1: Change in HF power within the second session, mothers and fathers separately*

| <b>Mothers (102 observations)</b>      | <b>B (SE)</b> | <b>P-Value</b> |
|----------------------------------------|---------------|----------------|
| Intercept <sup>a</sup>                 | 8.47 (0.58)   | <0.001***      |
| Session part: last                     | 4.52 (0.82)   | <0.001***      |
| Treatment: MT+SSC                      | 1.13 (0.81)   | 0.201          |
| Session part: last X treatment: MT+SSC | 8.03 (1.14)   | <0.001***      |
| <b>Fathers (22 observations)</b>       |               |                |
| Intercept                              | 7.41 (2.86)   | 0.022*         |
| Session part: last                     | 1.42 (3.09)   | 0.653          |
| Treatment: MT+SSC                      | 3.35 (3.07)   | 0.326          |
| Session part: last X treatment: MT+SSC | -0.57 (3.31)  | 0.867          |

HF, high frequency; MT, music therapy; SSC, skin-to-skin care

<sup>a</sup> Intercept is the predicted value for the sample in the first part of the 2nd SSC session.

B, beta coefficient; SE, standard error.

Table S2: Primary outcome: covariate examination

| <b>HF: Change within session + Covariates (no. of observations: 124)</b> | <b>B (SE)</b>  | <b>P-value</b> |
|--------------------------------------------------------------------------|----------------|----------------|
| Intercept                                                                | 16.44 (12.08)  | 0.177          |
| Session part: last                                                       | 4.52 (0.96)    | <0.001***      |
| Parent: Fathers                                                          | -3.61 (1.90)   | 0.061          |
| Infant gender: Female                                                    | 0.24 (1.03)    | 0.821          |
| Gestational Age in weeks                                                 | -0.20 (0.35)   | 0.556          |
| Postnatal age in days at T1                                              | -0.05 (0.05)   | 0.404          |
| Birthweight                                                              | -0.00 (0.00)   | 0.800          |
| Neonatal medical index grade                                             | 0.01 (1.16)    | 0.992          |
| Treatment: MT+SSC                                                        | -10.55 (16.51) | 0.524          |
| Session part: last X treatment: MT+SSC                                   | 5.05 (1.29)    | <0.001***      |
| Parent: Fathers X treatment: MT+SSC                                      | -1.21 (2.18)   | 0.581          |
| Infant gender: Female X treatment: MT+SSC                                | -0.36 (1.41)   | 0.807          |
| Gestational Age in weeks X treatment: MT+SSC                             | 0.34 (0.49)    | 0.486          |
| Postnatal age in days at T1 X treatment: MT+SSC                          | 0.10 (0.07)    | 0.188          |
| Birthweight X treatment: MT+SSC                                          | 0.00 (0.00)    | 0.891          |
| Neonatal medical index grade X treatment: MT+SSC                         | -0.07 (1.41)   | 0.962          |

HF, high frequency; MT, music therapy; SSC, skin-to-skin care

<sup>a</sup> Intercept is the predicted value for mothers in the first part of the 2nd SSC session.

B, beta coefficient; SE, standard error.

Table S3: Observed values of HRV parameters in all 3 sessions

| Variable                | MT+SSC       | SSC          | P-value <sup>a</sup> | Effect Size            |
|-------------------------|--------------|--------------|----------------------|------------------------|
|                         | ms2/Hz (SD)  | ms2/Hz (SD)  |                      | d (95% CI)             |
| Mean HF T1              | 12.34(2.50)  | 12.15(2.07)  | .739                 | .081(-.402, .565)      |
| Mean HF T1M             | 12.20 (2.64) | 12.09(2.34)  | .874                 | .040(-.463, .544)      |
| Mean HF T1F             | 12.36(2.71)  | 12.30(2.71)  | .963                 | .023(-.930, .975)      |
| Mean LF T1              | 16.94(3.03)  | 17.74(5.64)  | .485                 | -.180(-.663, .305)     |
| Mean LF T1M             | 17.49(2.80)  | 18.72(5.52)  | .292                 | -.288(-.793, .219)     |
| Mean LF T1F             | 12.61(1.99)  | 12.41(2.63)  | .866                 | .086(-.896, 1.065)     |
| Mean LF/HF ratio T1     | 1.49(0.48)   | 1.53(0.61)   | .799                 | -.065(-.552, .423)     |
| Mean LF/HF ratio T1M    | 1.54(0.48)   | 1.64(0.62)   | .501                 | -.181(-.689, .330)     |
| Mean LF/HF ratio T1F    | 1.14(0.27)   | 1.00(0.24)   | .302                 | .537(-.472, 1.527)     |
| Mean HF T2              | 12.74(3.22)  | 13.02(2.67)  | .708                 | -.095(-.600, .411)     |
| Mean HF T2M             | 12.85(3.65)  | 13.10(2.77)  | .771                 | -.077(-.601, .447)     |
| Mean HF T2F             | 12.81(2.30)  | 13.90(1.500) | .386                 | -.503(-1.815, .834)    |
| Mean LF T2              | 12.63(2.45)  | 15.20(3.20)  | .001***              | -.916(-1.443, -.381)   |
| Mean LF T2M             | 13.02(2.33)  | 15.52(3.26)  | .002***              | -.892(-1.434, -.342)   |
| Mean LF T2F             | 11.59(3.25)  | 11.27(2.31)  | .858                 | .105(-1.205, 1.410)    |
| Mean LF/HF ratio T2     | 1.11(0.38)   | 1.26(0.40)   | .145                 | -.384(-.892, .128)     |
| Mean LF/HF ratio T2M    | 1.16(0.41)   | 1.28(0.40)   | .274                 | -.293(-.814, .231)     |
| Mean LF/HF ratio T2F    | 0.92(0.29)   | 0.73(0.15)   | .189                 | .713(-.646, 2.039)     |
| Mean HF T3              | 13.54(2.39)  | 12.48(2.24)  | .109                 | .458(-.106, 1.017)     |
| Mean HF T3M             | 13.73(2.52)  | 12.21(2.22)  | .038*                | .632(.025, 1.231)      |
| Mean HF T3F             | 12.62(2.40)  | 14.73(1.19)  | .149                 | -1.016(-2.519, .557)   |
| Mean LF T3              | 17.73(2.99)  | 22.06(2.86)  | .001***              | -1.108(-1.699, -.508)  |
| Mean LF T3M             | 18.52(2.24)  | 23.33(4.47)  | .000***              | -1.414(-2.067, -.748)  |
| Mean LF T3F             | 13.14(2.26)  | 13.00(4.59)  | .964                 | .043(-1.390, 1.473)    |
| Mean LF/HF ratio T3     | 1.37(0.27)   | 1.91(0.53)   | .000***              | -1.336(-1.944, -.716)  |
| Mean LF/HF ratio T3M    | 1.41(0.27)   | 2.06(0.49)   | .000***              | -1.697(-2.378, -1.002) |
| Mean LF/HF ratio T3F    | 1.14(0.32)   | 0.87(0.30)   | .288                 | .865(-.675, 2.343)     |
| Mean HF all sessions    | 12.82(1.77)  | 12.60(1.26)  | .553                 | .141(-.337, .618)      |
| Mean HF all sessions, M | 12.76(2.39)  | 12.50(1.39)  | .565                 | .138(-.353, .627)      |
| Mean HF all sessions, F | 12.71(2.15)  | 12.98(2.37)  | .797                 | -.117(-.981, .749)     |
| Mean LF all sessions    | 15.61(1.71)  | 17.63(3.12)  | .002**               | -.826(-1.321, -.326)   |
| Mean LF all sessions, M | 16.14(1.64)  | 18.47(2.84)  | .000***              | -1.032(-1.550, -.507)  |
| Mean LF all sessions, F | 12.17(2.06)  | 11.99(2.21)  | .859                 | .084(-.813, .977)      |

|                                  |             |             |                   |                      |
|----------------------------------|-------------|-------------|-------------------|----------------------|
| Mean LF/HF ratio all sessions    | 1.31(0.28)  | 1.50(0.36)  | .025              | -.574(-1.059, -.085) |
| Mean LF/HF ratio all sessions, M | 1.38(0.30)  | 1.59(0.33)  | .010*             | -.670(-1.170, -.165) |
| Mean LF/HF ratio all sessions, F | 1.03(0.20)  | 0.90(0.12)  | .096              | .726(-.208, 1.642)   |
| HF change T2                     | 9.80(6.89)  | 4.43(2.21)  | .000***           | .998(.438, 1.549)    |
| HF change T2M                    | 12.55(5.35) | 4.52(2.21)  | .000***           | 1.946(1.269, 2.610)  |
| HF change T2F                    | 0.85(4.47)  | 1.10(N/A)   | .960 <sup>1</sup> | -.055(-2.119, 2.103) |
| LF change T2                     | -5.78(3.16) | -8.47(3.67) | .005**            | .791(.245, 1.332)    |
| LF change T2M                    | -6.37(3.29) | -8.65(4.12) | .035*             | .612(.047, 1.172)    |
| LF change T2F                    | -4.48(2.99) | -6.17(2.77) | .425              | .572(-.771, 1.889)   |
| LF/HF ratio change T2            | -1.18(0.61) | -1.62(0.73) | .020*             | .660(.119, 1.194)    |
| LF/HF ratio change T2M           | -1.37(0.69) | -1.71(0.73) | .096              | .476(-.084, 1.030)   |
| LF/HF ratio change T2F           | -0.65(0.53) | -0.43(0.58) | .599              | -.409(-1.718, .919)  |

MT, music therapy; SSC, skin-to-skin care; HF, high frequency; LF, low frequency; T1, first session, T2, second session, T3, third session; M, mothers, F, fathers.

<sup>a</sup> *P*-values are from t-tests not assuming equal variances except where indicated. <sup>1</sup> n=1; *p*-value only given for equal variance assumed. \* *p* < 0.05; \*\* *p* < 0.01; \*\*\* *p* < 0.001.

*Table S4: Observed values of parental scores on the Maternal Postnatal Attachment Scale and State Trait Anxiety Inventory*

| Variable                                | MT+SSC       | SSC          | P-Value <sup>a</sup> | Effect Size          |
|-----------------------------------------|--------------|--------------|----------------------|----------------------|
| Maternal Postnatal Attachment Scale     | M(SD)        | M(SD)        |                      | d (95% CI)           |
| T1                                      | 77.99(8.33)  | 80.95(6.10)  | .102                 | -.399(-.887, .092)   |
| T1. M                                   | 78.35(8.72)  | 81.25(5.48)  | .117                 | -.390(-.898, .122)   |
| T1. F                                   | 76.00(6.78)  | 81.28(7.43)  | .119                 | -.745(-1.649, .178)  |
| T2                                      | 75.65(6.77)  | 81.67(5.77)  | .031*                | -.977(-1.795, -.142) |
| T2. M                                   | 76.71(7.55)  | 81.32(5.80)  | .133                 | -.717(-1.542, .123)  |
| T2. F                                   | 76.07(4.08)  | 90.00        | .055 <sup>1</sup>    | -3.410(-6.716, .066) |
| T3                                      | 79.17(4.49)  | 79.74(8.08)  | .767                 | -.091(-.645, .464)   |
| T3. M                                   | 79.91(4.76)  | 80.81(6.32)  | .598                 | -.165(-.753, .425)   |
| T3. F                                   | 75.28(3.79)  | 72.10(14.45) | .741                 | .381(-1.032, 1.767)  |
| State Trait Anxiety Inventory (STAI)    |              |              |                      |                      |
| T1 Pre                                  | 34.92(11.62) | 32.17(7.58)  | .248                 | .275(-.210, .757)    |
| T1.M Pre                                | 35.74(13.62) | 32.00(8.12)  | .184                 | .324(-.183, .828)    |
| T1.F Pre                                | 33.83(10.68) | 34.11(10.31) | .953                 | -.026(-.890, .838)   |
| T1 Post                                 | 26.67(7.68)  | 26.63(5.86)  | .980                 | .006(-.475, .488)    |
| T1.M Post                               | 27.40(8.92)  | 26.81(7.10)  | .775                 | .072(-.431, .573)    |
| T1.F Post                               | 25.67(4.29)  | 27.67(8.72)  | .539                 | -.307(-1.173, .566)  |
| T2 Pre                                  | 35.12(10.64) | 29.13(6.95)  | .014*                | .659(.122, 1.190)    |
| T2.M Pre                                | 37.00(12.11) | 29.36(8.12)  | .010*                | .735(.169, 1.295)    |
| T2.F Pre                                | 31.00(5.00)  | 31.20(10.35) | .970                 | -.026(-1.173, 1.122) |
| T2 Post                                 | 27.08(6.73)  | 25.85(6.80)  | .496                 | .182(-.340, .702)    |
| T2.M Post                               | 27.92(7.82)  | 25.64(7.53)  | .288                 | .298(-.251, .843)    |
| T2.F Post                               | 26.57(5.06)  | 27.80(5.07)  | .689                 | -.243(-1.389, .916)  |
| T3 Pre                                  | 28.90(6.19)  | 28.39(8.11)  | .807                 | .072(-.483, .626)    |
| T3.M Pre                                | 27.83(6.08)  | 27.10(6.10)  | .693                 | .120(-.474, .714)    |
| T3.F Pre                                | 34.50(6.83)  | 35.00(16.70) | .964                 | -.047(-1.431, 1.341) |
| T3 Post                                 | 23.59(3.96)  | 23.39        | .853                 | .052(-.502, .606)    |
| T3.M Post                               | 23.29(4.04)  | 22.85(3.17)  | .686                 | .120(-.474, .714)    |
| T3.F Post                               | 25.67(3.67)  | 26.00(6.00)  | .936                 | -.075(-1.459, 1.314) |
| Change in STAI scores, pre to post test |              |              |                      |                      |
| T1                                      | -8.24(7.51)  | -5.53(4.01)  | .064                 | -.437(-.923, .052)   |
| T1.M                                    | -8.34(7.80)  | -5.18(4.22)  | .050*                | -.476(-.983, .035)   |
| T1.F                                    | -8.17(8.55)  | -6.44(4.13)  | .550                 | -.245(-1.109, .626)  |
| T2                                      | -8.03(7.59)  | -3.28(3.76)  | .004**               | -.781(-1.318, -.238) |
| T2. M                                   | -9.07(7.90)  | -3.72(4.56)  | .004**               | -.822(-1.385, -.251) |
| T2. F                                   | -4.43(3.95)  | -3.40(5.90)  | .745                 | -.213(-1.359, .943)  |

|       |             |              |      |                     |
|-------|-------------|--------------|------|---------------------|
| T3    | -5.31(4.42) | -5.00(5.54)  | .830 | -.063(-.617, .492)  |
| T3. M | -4.54(4.19) | -4.25(4.40)  | .824 | -.068(-.661, .526)  |
| T3. F | -8.83       | -9.00(10.82) | .982 | .021(-1.365, 1.407) |

MT, music therapy; SSC, skin-to-skin care; T1, first session, T2, second session, T3, third session; M, mothers, F, fathers.

<sup>a</sup>P-values are from t-tests not assuming equal variances except where indicated. <sup>1</sup> n=1; p-value only given for equal variance assumed. \* p < 0.05; \*\* p < 0.01; \*\*\* p < 0.001.
