# Supplementary figures and images for: Effects of Live Music Therapy on Autonomic Stability in Preterm Infants: A Cluster-Randomized Controlled Trial
Source: MDPI journal article supplement (doi:10.3390/children8111077), 2021-11-22

## CONSORT 2010 Flow Diagram

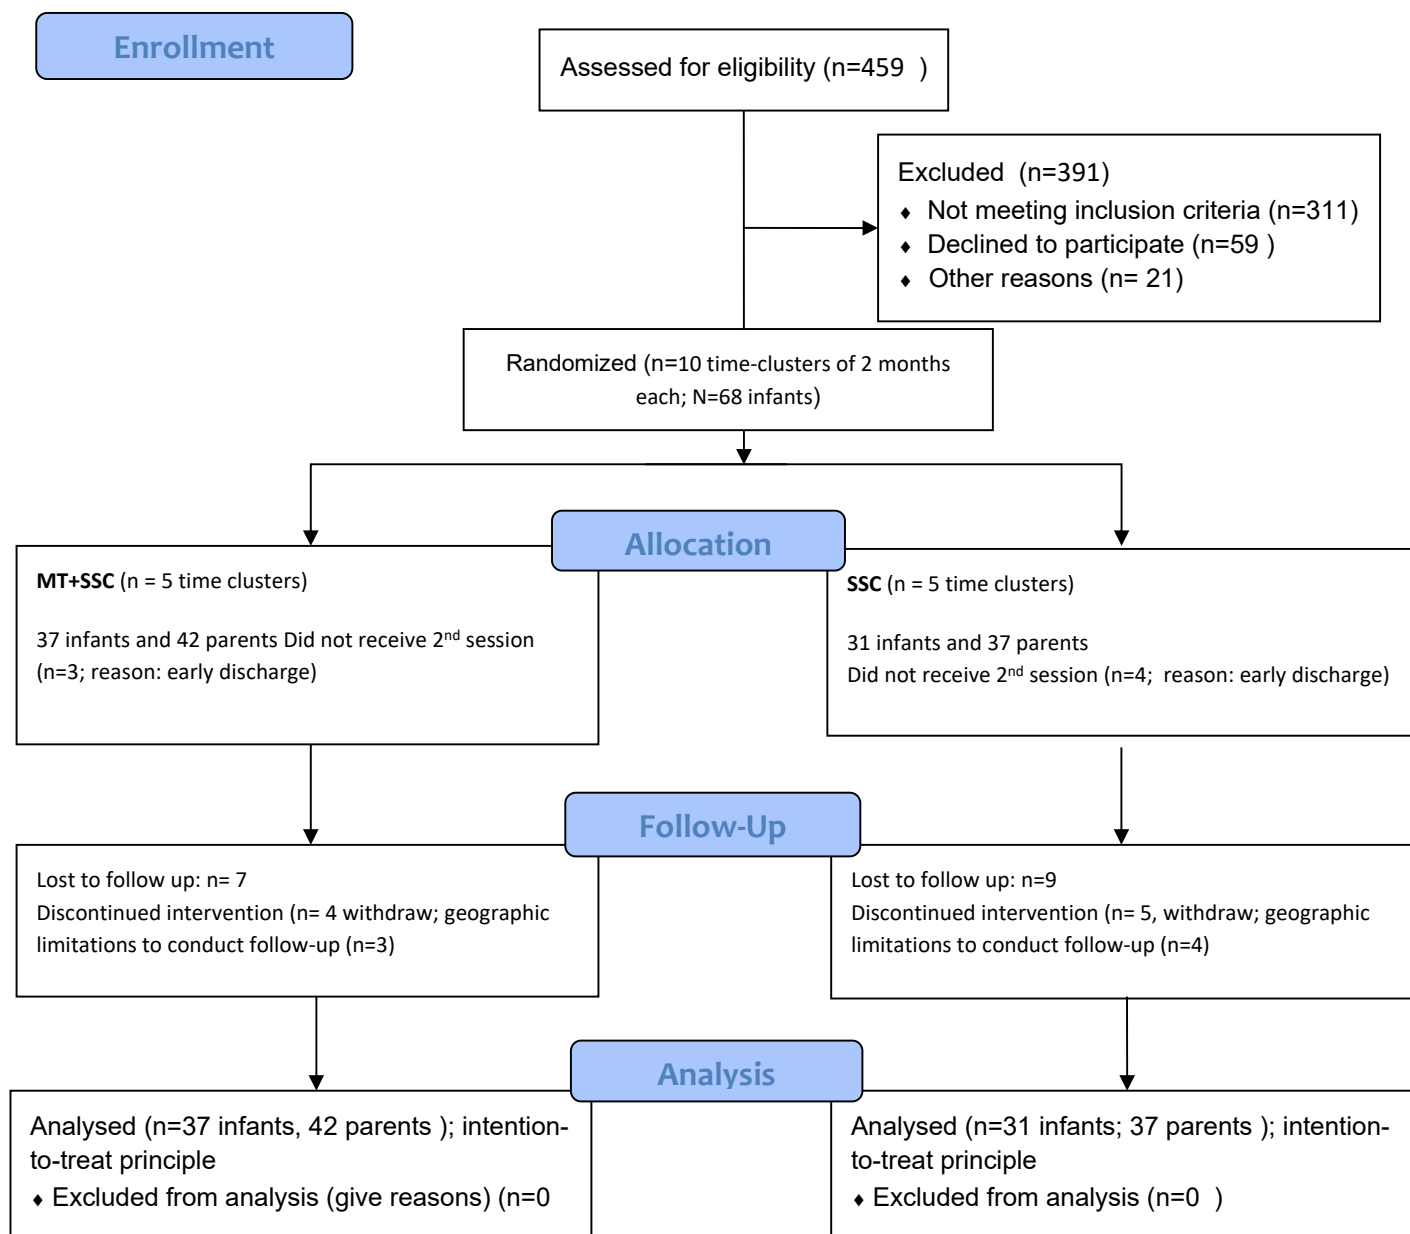

Supplement: s1 [file s1]
